# Supplementary material for: Novel candidates of pathogenic variants of the BRCA1 and BRCA2 genes from a dataset of 3,552 Japanese whole genomes (3.5KJPNv2)
Source: PLoS One. 2021 Jan 11;16(1):e0236907. doi: 10.1371/journal.pone.0236907 (PMC7799847; doi:10.1371/journal.pone.0236907)
Supplement: S2 Table — (XLSX) [file pone.0236907.s002.xlsx]

## Sheet: S2 Table
S2 Table. InterVar P or LP variants in the BRCA genes of the RIKEN 2,234 Japanese whole genome sequence dataset
#Chr	Start	End	Ref	Alt	Ref.Gene	ExonicFunc.refGene	avsnp147	AAChange.refGene	clinvar: Clinvar	InterVar: InterVar and Evidence	CADD_phred	DANN_rankscore	Eigen-raw	3.5KJPN AF	RIKEN	RATIO
13	32914065	32914069	CAATT	C	BRCA2	frameshift substitution	rs770318608	BRCA2:NM_000059:exon11:c.5573_5577C	clinvar: UNK	InterVar: Likely pathogenic PVS1=1 PS=[0, 0, 0, 0, 0] PM=[0, 1, 0, 0, 0, 0, 0] PP=[0, 0, 0, 0, 0, 0] BA1=0 BS=[0, 0, 0, 0, 0] BP=[0, 0, 0, 0, 0, 0, 0, 0]	.	.	.	0.0002	0.00194932	9.7466
13	32945234	32945234	G	T	BRCA2	stopgain	rs80359121	BRCA2:NM_000059:exon20:c.G8629T:p.E2877X	clinvar: Pathogenic	InterVar: Pathogenic PVS1=1 PS=[0, 0, 0, 0, 0] PM=[0, 1, 0, 0, 0, 0, 0] PP=[0, 0, 1, 0, 1, 0] BA1=0 BS=[0, 0, 0, 0, 0] BP=[0, 0, 0, 0, 0, 0, 0, 0]	51	0.741	1.056	0	0.00146199	NA
17	41258497	41258497	A	T	BRCA1	stopgain	rs80357086	BRCA1:NM_007297:exon3:c.T47A:p.L16X,BRCA1:NM_007298:exon3:c.T188A:p.L63X,BRCA1:NM_007294:exon4:c.T188A:p.L63X,BRCA1:NM_007299:exon4:c.T188A:p.L63X,BRCA1:NM_007300:exon4:c.T188A:p.L63X	clinvar: Pathogenic	InterVar: Pathogenic PVS1=1 PS=[0, 0, 0, 0, 0] PM=[0, 1, 0, 0, 0, 0, 0] PP=[0, 0, 1, 0, 1, 0] BA1=0 BS=[0, 0, 0, 0, 0] BP=[0, 0, 0, 0, 0, 0, 0, 0]	39	0.435	0.807	0.0003	0.00487329	16.2443
17	41258531	41258531	G	A	BRCA1	nonsynonymous SNV	rs80357084	BRCA1:NM_007297:exon3:c.C13T:p.L5F,BRCA1:NM_007298:exon3:c.C154T:p.L52F,BRCA1:NM_007294:exon4:c.C154T:p.L52F,BRCA1:NM_007299:exon4:c.C154T:p.L52F,BRCA1:NM_007300:exon4:c.C154T:p.L52F	clinvar: Conflicting_interpretations_of_pathogenicity	InterVar: Likely pathogenic PVS1=0 PS=[0, 0, 0, 0, 0] PM=[1, 1, 0, 0, 0, 0, 0] PP=[0, 0, 1, 0, 1, 0] BA1=0 BS=[0, 0, 0, 0, 0] BP=[1, 0, 0, 0, 0, 0, 0, 0]	28.3	0.966	0.574	0.0037	0.00194932	0.526843
