# Supplementary material for: Novel candidates of pathogenic variants of the BRCA1 and BRCA2 genes from a dataset of 3,552 Japanese whole genomes (3.5KJPNv2)
Source: PLoS One. 2021 Jan 11;16(1):e0236907. doi: 10.1371/journal.pone.0236907 (PMC7799847; doi:10.1371/journal.pone.0236907)
Supplement: S4 Table — (XLSX) [file pone.0236907.s004.xlsx]

## Sheet: S4 Table
S4 Table. Details of "pathogenic" BRCA variants but not P or LP by InterVar in Momozawa et al. (Ref. 14)
#Chr	Start	End	Ref	Alt	Ref.Gene	Func.refGene	ExonicFunc.refGene	avsnp147	AAChange.refGene	clinvar: Clinvar	InterVar: InterVar and Evidence	CADD_phred	Eigen-raw	3.5KJPNv2
17	41201179	41201179	C	T	BRCA1	exonic	nonsynonymous SNV	rs80357078	BRCA1:NM_007297:exon20:c.G5224A:p.A1742T,BRCA1:NM_007298:exon20:c.G2053A:p.A685T,BRCA1:NM_007294:exon21:c.G5365A:p.A1789T,BRCA1:NM_007300:exon22:c.G5428A:p.A1810T	clinvar: Uncertain_significance	InterVar: Uncertain significance PVS1=0 PS=[0, 0, 0, 0, 0] PM=[0, 1, 0, 0, 0, 0, 0] PP=[0, 0, 1, 0, 0, 0] BA1=0 BS=[0, 0, 0, 0, 0] BP=[1, 0, 0, 0, 0, 0, 0, 0]	32	0.683	.
17	41215947	41215947	C	T	BRCA1	exonic	nonsynonymous SNV	rs41293459	BRCA1:NM_007297:exon16:c.G4955A:p.R1652Q,BRCA1:NM_007298:exon16:c.G1784A:p.R595Q,BRCA1:NM_007294:exon17:c.G5096A:p.R1699Q,BRCA1:NM_007299:exon17:c.G1784A:p.R595Q,BRCA1:NM_007300:exon18:c.G5159A:p.R1720Q	clinvar: Conflicting_interpretations_of_pathogenicity	InterVar: Uncertain significance PVS1=0 PS=[0, 0, 0, 0, 0] PM=[0, 1, 0, 0, 0, 0, 0] PP=[0, 0, 1, 0, 1, 0] BA1=0 BS=[0, 0, 0, 0, 0] BP=[1, 0, 0, 0, 0, 0, 0, 0]	35	0.871	0.0003
17	41219633	41219633	A	G	BRCA1	exonic	nonsynonymous SNV	rs80357061	BRCA1:NM_007297:exon15:c.T4925C:p.M1642T,BRCA1:NM_007298:exon15:c.T1754C:p.M585T,BRCA1:NM_007294:exon16:c.T5066C:p.M1689T,BRCA1:NM_007299:exon16:c.T1754C:p.M585T,BRCA1:NM_007300:exon17:c.T5129C:p.M1710T	clinvar: Uncertain_significance	InterVar: Uncertain significance PVS1=0 PS=[0, 0, 0, 0, 0] PM=[0, 1, 0, 0, 0, 0, 0] PP=[0, 0, 1, 0, 0, 0] BA1=0 BS=[0, 0, 0, 0, 0] BP=[1, 0, 0, 0, 0, 0, 0, 0]	24	0.571	.
17	41244265	41244265	T	C	BRCA1	exonic	nonsynonymous SNV	.	BRCA1:NM_007297:exon9:c.A3142G:p.K1048E,BRCA1:NM_007294:exon10:c.A3283G:p.K1095E,BRCA1:NM_007300:exon10:c.A3283G:p.K1095E	clinvar: UNK	InterVar: Likely benign PVS1=0 PS=[0, 0, 0, 0, 0] PM=[0, 1, 0, 0, 0, 0, 0] PP=[0, 0, 0, 0, 0, 0] BA1=0 BS=[0, 0, 0, 0, 0] BP=[1, 0, 0, 1, 0, 0, 0, 0]	10.71	-1.032	.
